# Supplementary material for: Tracing nitrate contamination sources and dynamics in an unconfined alluvial aquifer system (Velika Gorica well field, Croatia)
Source: Royal Society of Chemistry journal article supplement (doi:10.1039/d4em00527a), 2024-12-11
Supplement: d4em00527a3.pdf [file d4em00527a3.pdf]

## ARTICLE

Table S1 A summary of sample type, sampling location, number (N) of sampling points, frequency of sampling, period of sampling, type of treatment and analyses conducted after sampling.

| Sample type      | Location                                                                  | N of sampling points | Frequency | Period                           | Type of treatment            | Analyses                                 |
|------------------|---------------------------------------------------------------------------|----------------------|-----------|----------------------------------|------------------------------|------------------------------------------|
| groundwater      | catchment area of the Velika Gorica well field                            | 10                   | monthly   | from March 2021 to February 2022 | –                            | in-situ                                  |
|                  |                                                                           |                      |           |                                  | filtering<br>cooling at 4 °C | water chemistry<br>water stable isotopes |
| surface water    | Sava River (western part of the Zagreb aquifer)                           | 1                    | monthly   | from March 2021 to February 2022 | –                            | in-situ                                  |
|                  |                                                                           |                      |           |                                  | filtering<br>cooling at 4 °C | water chemistry<br>water stable isotopes |
| precipitation    | within the first sanitary protection zone of the Velika Gorica well field | 1                    | monthly   | from March 2021 to February 2022 | –                            | in-situ                                  |
|                  |                                                                           |                      |           |                                  | filtering<br>freezing        | nitrate stable isotopes                  |
| soil water       | pedological pit                                                           | 4                    | monthly   | from March 2021 to February 2022 | filtering<br>freezing        | nitrate stable isotopes                  |
| nitrogen sources | Central part of the Zagreb aquifer                                        | 6                    | once      | September 2021                   | drying and grinding          | isotopic composition of total nitrogen   |

Table S2 Descriptive statistics of 17 parameters (pH, EC, DO, T, Cl<sup>-</sup>, NO<sub>3</sub><sup>-</sup>, SO<sub>4</sub><sup>2-</sup>, HCO<sub>3</sub><sup>-</sup>, Na<sup>+</sup>, Mg<sup>2+</sup>, K<sup>+</sup>, Ca<sup>2+</sup>, δ<sup>15</sup>N<sub>NO3</sub>, δ<sup>18</sup>O<sub>NO3</sub>, δ<sup>2</sup>H<sub>2O</sub>, δ<sup>18</sup>O<sub>H2O</sub> and d-excess) measured in groundwater and Sava River.

|                                                     |      | Čp-23 | Lg-1  | Lg-4  | P-3   | P-7   | Vg-1  | Vg-10/2 | Vg-4  | Vg-5/2 | Vg-6  | Sava River |
|-----------------------------------------------------|------|-------|-------|-------|-------|-------|-------|---------|-------|--------|-------|------------|
| pH                                                  | Mean | 7.2   | 7.3   | 7.3   | 7.1   | 7.2   | 7.3   | 7.3     | 7.1   | 7.1    | 7.2   | 8.1        |
|                                                     | Min  | 7.0   | 7.0   | 7.0   | 6.9   | 7.0   | 7.0   | 7.1     | 6.9   | 7.0    | 7.0   | 7.8        |
|                                                     | Max  | 7.5   | 7.7   | 7.8   | 7.5   | 7.5   | 7.6   | 7.6     | 7.4   | 7.5    | 7.5   | 8.7        |
| EC (μs cm <sup>-1</sup> )                           | Mean | 782.4 | 696.0 | 793.3 | 787.1 | 777.7 | 781.4 | 688.9   | 905.4 | 851.8  | 808.0 | 413.7      |
|                                                     | Min  | 748.0 | 677.0 | 751.0 | 757.0 | 749.0 | 765.0 | 675.0   | 873.0 | 838.0  | 775.0 | 353.0      |
|                                                     | Max  | 804.0 | 713.0 | 823.0 | 799.0 | 796.0 | 801.0 | 706.0   | 938.0 | 881.0  | 862.0 | 461.0      |
| DO (mg O <sub>2</sub> L <sup>-1</sup> )             | Mean | 7.1   | 3.4   | 3.6   | 8.3   | 8.1   | 7.0   | 6.5     | 6.7   | 7.4    | 6.2   | 10.5       |
|                                                     | Min  | 6.6   | 0.6   | 1.2   | 7.6   | 7.3   | 6.2   | 6.0     | 6.1   | 6.4    | 5.6   | 7.1        |
|                                                     | Max  | 7.8   | 7.3   | 7.0   | 9.0   | 8.7   | 7.8   | 7.0     | 7.6   | 8.0    | 7.3   | 14.2       |
| T (°C)                                              | Mean | 13.2  | 13.0  | 13.0  | 13.0  | 13.2  | 13.3  | 12.6    | 14.1  | 13.5   | 14.1  | 13.6       |
|                                                     | Min  | 12.8  | 12.6  | 12.7  | 12.5  | 12.6  | 12.8  | 12.4    | 13.7  | 13.3   | 13.8  | 7.2        |
|                                                     | Max  | 13.8  | 13.9  | 13.3  | 14.7  | 13.7  | 14.1  | 13.0    | 15.0  | 14.2   | 14.8  | 25.0       |
| Cl <sup>-</sup> (mg L <sup>-1</sup> )               | Mean | 26.2  | 11.1  | 28.1  | 23.7  | 23.4  | 27.4  | 10.1    | 55.6  | 26.4   | 37.2  | 8.7        |
|                                                     | Min  | 13.4  | 7.6   | 22.7  | 19.3  | 11.8  | 21.2  | 8.4     | 43.4  | 20.7   | 22.2  | 5.9        |
|                                                     | Max  | 32.2  | 14.5  | 33.0  | 31.8  | 35.9  | 32.0  | 13.1    | 71.6  | 31.7   | 63.4  | 12.4       |
| NO <sub>3</sub> <sup>-</sup> (mg L <sup>-1</sup> )  | Mean | 16.2  | 20.1  | 15.6  | 17.1  | 13.4  | 15.5  | 20.3    | 14.8  | 25.1   | 12.7  | 5.2        |
|                                                     | Min  | 12.6  | 15.0  | 7.4   | 14.6  | 9.2   | 13.2  | 17.5    | 11.4  | 19.4   | 9.0   | 3.5        |
|                                                     | Max  | 19.4  | 25.8  | 19.0  | 20.0  | 17.9  | 18.6  | 23.0    | 18.9  | 31.9   | 16.7  | 6.5        |
| SO <sub>4</sub> <sup>2-</sup> (mg L <sup>-1</sup> ) | Mean | 21.2  | 13.5  | 23.1  | 16.8  | 13.1  | 23.3  | 14.0    | 21.1  | 19.7   | 20.7  | 12.2       |
|                                                     | Min  | 13.4  | 9.2   | 17.9  | 12.1  | 7.5   | 16.9  | 11.6    | 18.3  | 15.6   | 15.2  | 6.3        |
|                                                     | Max  | 26.6  | 17.3  | 26.3  | 22.3  | 18.7  | 27.8  | 18.2    | 26.9  | 24.8   | 27.9  | 17.0       |
| HCO <sub>3</sub> <sup>-</sup> (mg L <sup>-1</sup> ) | Mean | 423.6 | 407.5 | 426.7 | 443.7 | 451.5 | 426.0 | 401.8   | 445.8 | 460.8  | 425.6 | -          |
|                                                     | Min  | 378.6 | 378.6 | 359.9 | 397.2 | 422.0 | 415.8 | 359.9   | 391.0 | 415.8  | 397.2 | -          |
|                                                     | Max  | 440.6 | 415.8 | 453.0 | 453.0 | 484.1 | 440.6 | 415.8   | 471.7 | 477.9  | 446.8 | -          |
| Na <sup>+</sup> (mg L <sup>-1</sup> )               | Mean | 12.6  | 6.2   | 11.2  | 10.4  | 10.9  | 11.5  | 5.6     | 29.1  | 13.9   | 22.2  | 7.0        |
|                                                     | Min  | 11.7  | 5.4   | 7.9   | 8.5   | 6.3   | 9.7   | 4.8     | 22.7  | 12.0   | 19.3  | 4.6        |
|                                                     | Max  | 14.6  | 7.6   | 15.3  | 14.0  | 17.2  | 15.6  | 7.2     | 37.2  | 17.9   | 27.9  | 10.1       |
| Mg <sup>2+</sup> (mg L <sup>-1</sup> )              | Mean | 24.4  | 24.2  | 26.1  | 26.9  | 27.3  | 24.6  | 25.1    | 26.2  | 25.9   | 23.4  | 13.6       |
|                                                     | Min  | 22.9  | 21.7  | 22.6  | 23.6  | 23.9  | 23.5  | 23.4    | 23.6  | 23.4   | 19.9  | 10.4       |
|                                                     | Max  | 26.7  | 25.8  | 33.8  | 35.1  | 31.2  | 26.1  | 32.2    | 33.1  | 28.3   | 29.5  | 19.8       |
| K <sup>+</sup> (mg L <sup>-1</sup> )                | Mean | 1.8   | 1.9   | 1.7   | 1.5   | 1.3   | 1.6   | 1.7     | 2.1   | 4.8    | 3.7   | 1.8        |
|                                                     | Min  | 1.6   | 1.6   | 1.3   | 1.2   | 0.9   | 1.3   | 1.5     | 1.6   | 4.4    | 3.0   | 1.1        |
|                                                     | Max  | 2.3   | 2.2   | 2.5   | 2.3   | 1.8   | 2.1   | 2.2     | 2.8   | 5.6    | 6.0   | 3.7        |
| Ca <sup>2+</sup> (mg L <sup>-1</sup> )              | Mean | 109.0 | 98.5  | 109.4 | 109.3 | 108.4 | 111.8 | 101.4   | 117.7 | 116.7  | 107.2 | 54.4       |
|                                                     | Min  | 105.1 | 77.6  | 84.3  | 100.6 | 97.5  | 106.8 | 95.3    | 90.5  | 97.4   | 97.3  | 35.7       |
|                                                     | Max  | 118.4 | 106.8 | 122.2 | 119.3 | 114.7 | 127.4 | 128.4   | 136.4 | 124.8  | 115.3 | 69.1       |
| δ <sup>15</sup> N <sub>NO3</sub> (‰)                | Mean | 10.4  | 10.9  | 15.9  | 8.5   | 8.6   | 10.5  | 9.2     | 11.2  | 9.6    | 12.1  | 8.8        |
|                                                     | Min  | 3.8   | 3.8   | 9.5   | 3.9   | 2.6   | 7.2   | 5.9     | 6.6   | 4.0    | 7.6   | 4.4        |
|                                                     | Max  | 17.6  | 15.6  | 38.9  | 14.1  | 14.5  | 13.3  | 13.4    | 18.3  | 14.8   | 16.7  | 13.1       |
| δ <sup>18</sup> O <sub>NO3</sub> (‰)                | Mean | 0.7   | 2.7   | 5.5   | 0.7   | 0.7   | 0.8   | 0.9     | 1.9   | 1.2    | 1.9   | 0.9        |
|                                                     | Min  | -4.0  | -3.2  | -1.3  | -3.5  | -6.7  | -1.8  | -5.1    | -3.4  | -2.1   | -1.8  | -0.8       |

|                                                |             |       |       |       |       |       |       |       |       |       |       |       |
|------------------------------------------------|-------------|-------|-------|-------|-------|-------|-------|-------|-------|-------|-------|-------|
|                                                | <i>Max</i>  | 4.0   | 8.0   | 17.6  | 3.7   | 4.7   | 4.6   | 4.5   | 5.0   | 4.3   | 4.7   | 3.9   |
| $\delta^2\text{H}_{\text{H}_2\text{O}}$ (‰)    | <i>Mean</i> | -60.0 | -63.5 | -61.0 | -59.7 | -60.5 | -60.7 | -64.5 | -59.4 | -59.7 | -58.0 | -60.2 |
|                                                | <i>Min</i>  | -60.5 | -64.1 | -61.9 | -60.3 | -61.5 | -61.2 | -65.0 | -59.7 | -60.3 | -58.7 | -61.8 |
|                                                | <i>Max</i>  | -59.7 | -62.8 | -60.1 | -59.0 | -59.7 | -59.8 | -64.1 | -59.2 | -58.4 | -57.5 | -59.2 |
| $\delta^{18}\text{O}_{\text{H}_2\text{O}}$ (‰) | <i>Mean</i> | -8.8  | -9.3  | -9.0  | -8.9  | -8.9  | -9.0  | -9.5  | -8.8  | -8.8  | -8.7  | -9.1  |
|                                                | <i>Min</i>  | -9.0  | -9.5  | -9.2  | -9.0  | -9.1  | -9.2  | -9.6  | -8.9  | -8.9  | -8.7  | -9.4  |
|                                                | <i>Max</i>  | -8.7  | -9.3  | -8.9  | -8.8  | -8.8  | -8.8  | -9.4  | -8.7  | -8.6  | -8.6  | -8.9  |
| <b>d-excess</b>                                | <i>Mean</i> | 10.7  | 11.2  | 11.1  | 11.1  | 10.9  | 11.1  | 11.3  | 11.1  | 10.9  | 11.2  | 12.7  |
|                                                | <i>Min</i>  | 10.2  | 10.4  | 10.3  | 10.0  | 10.1  | 10.4  | 10.5  | 10.3  | 10.4  | 10.8  | 11.7  |
|                                                | <i>Max</i>  | 11.2  | 12.2  | 11.7  | 11.8  | 11.7  | 12.2  | 11.9  | 11.7  | 11.3  | 11.8  | 13.6  |

Table S3 Correlation matrix of the major anions and cations for sampling site Vg-6 using the Pearson coefficient. All variables are in mg L<sup>-1</sup>.

|                               | Cl <sup>-</sup> | NO <sub>3</sub> <sup>-</sup> | SO <sub>4</sub> <sup>2-</sup> | HCO <sub>3</sub> <sup>-</sup> | Na <sup>+</sup> | Mg <sup>2+</sup> | K <sup>+</sup> | Ca <sup>2+</sup> |
|-------------------------------|-----------------|------------------------------|-------------------------------|-------------------------------|-----------------|------------------|----------------|------------------|
| Cl <sup>-</sup>               | 1.00            |                              |                               |                               |                 |                  |                |                  |
| NO <sub>3</sub> <sup>-</sup>  | 0.80            | 1.00                         |                               |                               |                 |                  |                |                  |
| SO <sub>4</sub> <sup>2-</sup> | 0.53            | 0.44                         | 1.00                          |                               |                 |                  |                |                  |
| HCO <sub>3</sub> <sup>-</sup> | -0.31           | -0.15                        | -0.49                         | 1.00                          |                 |                  |                |                  |
| Na <sup>+</sup>               | -0.22           | -0.39                        | -0.40                         | -0.08                         | 1.00            |                  |                |                  |
| Mg <sup>2+</sup>              | 0.10            | 0.24                         | 0.00                          | -0.01                         | 0.63            | 1.00             |                |                  |
| K <sup>+</sup>                | -0.35           | -0.30                        | -0.25                         | -0.20                         | 0.84            | 0.75             | 1.00           |                  |
| Ca <sup>2+</sup>              | 0.05            | -0.25                        | -0.32                         | 0.09                          | -0.14           | -0.60            | -0.49          | 1.00             |

Significance at p &lt; 0.05

Table S4 Correlation matrix of the major anions and cations for sampling site Vg-5/2 using the Pearson coefficient. All variables are in mg L<sup>-1</sup>.

|                               | Cl <sup>-</sup> | NO <sub>3</sub> <sup>-</sup> | SO <sub>4</sub> <sup>2-</sup> | HCO <sub>3</sub> <sup>-</sup> | Na <sup>+</sup> | Mg <sup>2+</sup> | K <sup>+</sup> | Ca <sup>2+</sup> |
|-------------------------------|-----------------|------------------------------|-------------------------------|-------------------------------|-----------------|------------------|----------------|------------------|
| Cl <sup>-</sup>               | 1.00            |                              |                               |                               |                 |                  |                |                  |
| NO <sub>3</sub> <sup>-</sup>  | 0.69            | 1.00                         |                               |                               |                 |                  |                |                  |
| SO <sub>4</sub> <sup>2-</sup> | 0.93            | 0.51                         | 1.00                          |                               |                 |                  |                |                  |
| HCO <sub>3</sub> <sup>-</sup> | 0.02            | -0.03                        | -0.01                         | 1.00                          |                 |                  |                |                  |
| Na <sup>+</sup>               | -0.43           | -0.53                        | -0.17                         | 0.41                          | 1.00            |                  |                |                  |
| Mg <sup>2+</sup>              | 0.49            | 0.36                         | 0.59                          | -0.09                         | -0.04           | 1.00             |                |                  |
| K <sup>+</sup>                | 0.15            | -0.01                        | 0.39                          | 0.24                          | 0.59            | 0.77             | 1.00           |                  |
| Ca <sup>2+</sup>              | 0.61            | 0.35                         | 0.63                          | -0.15                         | -0.21           | 0.69             | 0.34           | 1.00             |

Significance at p &lt; 0.05

Table S5 Correlation matrix of the major anions and cations for sampling site Ćp-23 using the Pearson coefficient. All variables are in mg L<sup>-1</sup>.

|                               | Cl <sup>-</sup> | NO <sub>3</sub> <sup>-</sup> | SO <sub>4</sub> <sup>2-</sup> | HCO <sub>3</sub> <sup>-</sup> | Na <sup>+</sup> | Mg <sup>2+</sup> | K <sup>+</sup> | Ca <sup>2+</sup> |
|-------------------------------|-----------------|------------------------------|-------------------------------|-------------------------------|-----------------|------------------|----------------|------------------|
| Cl <sup>-</sup>               | 1.00            |                              |                               |                               |                 |                  |                |                  |
| NO <sub>3</sub> <sup>-</sup>  | 0.28            | 1.00                         |                               |                               |                 |                  |                |                  |
| SO <sub>4</sub> <sup>2-</sup> | 0.97            | 0.26                         | 1.00                          |                               |                 |                  |                |                  |
| HCO <sub>3</sub> <sup>-</sup> | 0.68            | 0.03                         | 0.53                          | 1.00                          |                 |                  |                |                  |
| Na <sup>+</sup>               | 0.12            | 0.02                         | -0.07                         | 0.57                          | 1.00            |                  |                |                  |
| Mg <sup>2+</sup>              | 0.49            | 0.45                         | 0.43                          | 0.36                          | 0.37            | 1.00             |                |                  |
| K <sup>+</sup>                | -0.24           | 0.39                         | -0.31                         | -0.32                         | 0.21            | 0.47             | 1.00           |                  |
| Ca <sup>2+</sup>              | 0.38            | 0.19                         | 0.29                          | 0.36                          | 0.29            | 0.84             | 0.43           | 1.00             |

Significance at p &lt; 0.05

Table S6 Correlation matrix of the major anions and cations for sampling site Lg-1 using the Pearson coefficient. All variables are in mg L<sup>-1</sup>.

|                               | Cl <sup>-</sup> | NO <sub>3</sub> <sup>-</sup> | SO <sub>4</sub> <sup>2-</sup> | HCO <sub>3</sub> <sup>-</sup> | Na <sup>+</sup> | Mg <sup>2+</sup> | K <sup>+</sup> | Ca <sup>2+</sup> |
|-------------------------------|-----------------|------------------------------|-------------------------------|-------------------------------|-----------------|------------------|----------------|------------------|
| Cl <sup>-</sup>               | 1.00            |                              |                               |                               |                 |                  |                |                  |
| NO <sub>3</sub> <sup>-</sup>  | 0.36            | 1.00                         |                               |                               |                 |                  |                |                  |
| SO <sub>4</sub> <sup>2-</sup> | 0.91            | 0.28                         | 1.00                          |                               |                 |                  |                |                  |
| HCO <sub>3</sub> <sup>-</sup> | 0.38            | -0.20                        | 0.55                          | 1.00                          |                 |                  |                |                  |
| Na <sup>+</sup>               | -0.34           | -0.26                        | -0.24                         | 0.37                          | 1.00            |                  |                |                  |
| Mg <sup>2+</sup>              | 0.01            | 0.37                         | 0.07                          | -0.10                         | 0.38            | 1.00             |                |                  |
| K <sup>+</sup>                | -0.04           | -0.19                        | -0.03                         | 0.48                          | 0.86            | 0.49             | 1.00           |                  |
| Ca <sup>2+</sup>              | 0.29            | 0.55                         | 0.27                          | -0.07                         | -0.37           | -0.03            | -0.31          | 1.00             |

Significance at p &lt; 0.05

Table S7 Correlation matrix of the major anions and cations for sampling site Lg-4 using the Pearson coefficient. All variables are in mg L<sup>-1</sup>.

|                               | Cl <sup>-</sup> | NO <sub>3</sub> <sup>-</sup> | SO <sub>4</sub> <sup>2-</sup> | HCO <sub>3</sub> <sup>-</sup> | Na <sup>+</sup> | Mg <sup>2+</sup> | K <sup>+</sup> | Ca <sup>2+</sup> |
|-------------------------------|-----------------|------------------------------|-------------------------------|-------------------------------|-----------------|------------------|----------------|------------------|
| Cl <sup>-</sup>               | 1.00            |                              |                               |                               |                 |                  |                |                  |
| NO <sub>3</sub> <sup>-</sup>  | 0.07            | 1.00                         |                               |                               |                 |                  |                |                  |
| SO <sub>4</sub> <sup>2-</sup> | 0.88            | -0.18                        | 1.00                          |                               |                 |                  |                |                  |
| HCO <sub>3</sub> <sup>-</sup> | 0.16            | 0.57                         | -0.14                         | 1.00                          |                 |                  |                |                  |
| Na <sup>+</sup>               | 0.02            | 0.44                         | -0.44                         | 0.60                          | 1.00            |                  |                |                  |
| Mg <sup>2+</sup>              | 0.07            | 0.13                         | -0.15                         | 0.26                          | 0.51            | 1.00             |                |                  |
| K <sup>+</sup>                | 0.14            | 0.45                         | -0.29                         | 0.60                          | 0.87            | 0.81             | 1.00           |                  |
| Ca <sup>2+</sup>              | 0.35            | 0.35                         | 0.31                          | 0.06                          | -0.12           | -0.51            | -0.22          | 1.00             |

Significance at p &lt; 0.05

Table S8 Correlation matrix of the major anions and cations for sampling site P-3 using the Pearson coefficient. All variables are in mg L<sup>-1</sup>.

|                               | Cl <sup>-</sup> | NO <sub>3</sub> <sup>-</sup> | SO <sub>4</sub> <sup>2-</sup> | HCO <sub>3</sub> <sup>-</sup> | Na <sup>+</sup> | Mg <sup>2+</sup> | K <sup>+</sup> | Ca <sup>2+</sup> |
|-------------------------------|-----------------|------------------------------|-------------------------------|-------------------------------|-----------------|------------------|----------------|------------------|
| Cl <sup>-</sup>               | 1.00            |                              |                               |                               |                 |                  |                |                  |
| NO <sub>3</sub> <sup>-</sup>  | 0.21            | 1.00                         |                               |                               |                 |                  |                |                  |
| SO <sub>4</sub> <sup>2-</sup> | 0.94            | 0.01                         | 1.00                          |                               |                 |                  |                |                  |
| HCO <sub>3</sub> <sup>-</sup> | 0.09            | -0.21                        | 0.32                          | 1.00                          |                 |                  |                |                  |
| Na <sup>+</sup>               | 0.10            | -0.59                        | 0.36                          | 0.32                          | 1.00            |                  |                |                  |
| Mg <sup>2+</sup>              | -0.08           | -0.21                        | 0.06                          | 0.00                          | 0.62            | 1.00             |                |                  |
| K <sup>+</sup>                | 0.40            | -0.24                        | 0.48                          | -0.02                         | 0.69            | 0.81             | 1.00           |                  |
| Ca <sup>2+</sup>              | 0.46            | 0.05                         | 0.49                          | 0.07                          | -0.03           | -0.12            | 0.01           | 1.00             |

Table S9 Correlation matrix of the major anions and cations for sampling site Vg-1 using the Pearson coefficient. All variables are in mg L<sup>-1</sup>.

|                               | Cl <sup>-</sup> | NO <sub>3</sub> <sup>-</sup> | SO <sub>4</sub> <sup>2-</sup> | HCO <sub>3</sub> <sup>-</sup> | Na <sup>+</sup> | Mg <sup>2+</sup> | K <sup>+</sup> | Ca <sup>2+</sup> |
|-------------------------------|-----------------|------------------------------|-------------------------------|-------------------------------|-----------------|------------------|----------------|------------------|
| Cl <sup>-</sup>               | 1.00            |                              |                               |                               |                 |                  |                |                  |
| NO <sub>3</sub> <sup>-</sup>  | -0.14           | 1.00                         |                               |                               |                 |                  |                |                  |
| SO <sub>4</sub> <sup>2-</sup> | 0.99            | -0.16                        | 1.00                          |                               |                 |                  |                |                  |
| HCO <sub>3</sub> <sup>-</sup> | -0.35           | 0.13                         | -0.37                         | 1.00                          |                 |                  |                |                  |
| Na <sup>+</sup>               | -0.56           | -0.15                        | -0.56                         | 0.58                          | 1.00            |                  |                |                  |
| Mg <sup>2+</sup>              | -0.04           | -0.08                        | 0.07                          | 0.04                          | 0.39            | 1.00             |                |                  |
| K <sup>+</sup>                | -0.01           | 0.25                         | -0.07                         | 0.15                          | 0.44            | 0.35             | 1.00           |                  |
| Ca <sup>2+</sup>              | -0.63           | -0.15                        | -0.61                         | 0.35                          | 0.94            | 0.49             | 0.49           | 1.00             |

Significance at p &lt; 0.05

Table S10 Correlation matrix of the major anions and cations for sampling site P-7 using the Pearson coefficient. All variables are in mg L<sup>-1</sup>.

|                               | Cl <sup>-</sup> | NO <sub>3</sub> <sup>-</sup> | SO <sub>4</sub> <sup>2-</sup> | HCO <sub>3</sub> <sup>-</sup> | Na <sup>+</sup> | Mg <sup>2+</sup> | K <sup>+</sup> | Ca <sup>2+</sup> |
|-------------------------------|-----------------|------------------------------|-------------------------------|-------------------------------|-----------------|------------------|----------------|------------------|
| Cl <sup>-</sup>               | 1.00            |                              |                               |                               |                 |                  |                |                  |
| NO <sub>3</sub> <sup>-</sup>  | 0.89            | 1.00                         |                               |                               |                 |                  |                |                  |
| SO <sub>4</sub> <sup>2-</sup> | 0.99            | 0.91                         | 1.00                          |                               |                 |                  |                |                  |
| HCO <sub>3</sub> <sup>-</sup> | -0.52           | -0.49                        | -0.52                         | 1.00                          |                 |                  |                |                  |
| Na <sup>+</sup>               | 0.85            | 0.89                         | 0.87                          | -0.45                         | 1.00            |                  |                |                  |
| Mg <sup>2+</sup>              | 0.10            | 0.25                         | 0.23                          | 0.07                          | 0.15            | 1.00             |                |                  |
| K <sup>+</sup>                | 0.89            | 0.89                         | 0.90                          | -0.50                         | 0.92            | 0.26             | 1.00           |                  |
| Ca <sup>2+</sup>              | 0.44            | 0.49                         | 0.47                          | -0.10                         | 0.28            | 0.69             | 0.58           | 1.00             |

Significance at p &lt; 0.05

Table S11 Correlation matrix of the major anions and cations for sampling site Vg-10/2 using the Pearson coefficient. All variables are in mg L<sup>-1</sup>.

|                               | Cl <sup>-</sup> | NO <sub>3</sub> <sup>-</sup> | SO <sub>4</sub> <sup>2-</sup> | HCO <sub>3</sub> <sup>-</sup> | Na <sup>+</sup> | Mg <sup>2+</sup> | K <sup>+</sup> | Ca <sup>2+</sup> |
|-------------------------------|-----------------|------------------------------|-------------------------------|-------------------------------|-----------------|------------------|----------------|------------------|
| Cl <sup>-</sup>               | 1.00            |                              |                               |                               |                 |                  |                |                  |
| NO <sub>3</sub> <sup>-</sup>  | 0.79            | 1.00                         |                               |                               |                 |                  |                |                  |
| SO <sub>4</sub> <sup>2-</sup> | 0.96            | 0.87                         | 1.00                          |                               |                 |                  |                |                  |
| HCO <sub>3</sub> <sup>-</sup> | 0.29            | 0.35                         | 0.22                          | 1.00                          |                 |                  |                |                  |
| Na <sup>+</sup>               | -0.26           | -0.45                        | -0.30                         | 0.26                          | 1.00            |                  |                |                  |
| Mg <sup>2+</sup>              | -0.09           | -0.05                        | -0.03                         | 0.16                          | 0.74            | 1.00             |                |                  |
| K <sup>+</sup>                | -0.20           | -0.15                        | -0.16                         | 0.27                          | 0.84            | 0.84             | 1.00           |                  |
| Ca <sup>2+</sup>              | -0.25           | -0.48                        | -0.35                         | 0.17                          | 0.55            | -0.13            | 0.26           | 1.00             |

Significance at p &lt; 0.05

Table S12 Correlation matrix of the major anions and cations for sampling site Vg-4 using the Pearson coefficient. All variables are in mg L<sup>-1</sup>.

|                               | Cl <sup>-</sup> | NO <sub>3</sub> <sup>-</sup> | SO <sub>4</sub> <sup>2-</sup> | HCO <sub>3</sub> <sup>-</sup> | Na <sup>+</sup> | Mg <sup>2+</sup> | K <sup>+</sup> | Ca <sup>2+</sup> |
|-------------------------------|-----------------|------------------------------|-------------------------------|-------------------------------|-----------------|------------------|----------------|------------------|
| Cl <sup>-</sup>               | 1.00            |                              |                               |                               |                 |                  |                |                  |
| NO <sub>3</sub> <sup>-</sup>  | -0.19           | 1.00                         |                               |                               |                 |                  |                |                  |
| SO <sub>4</sub> <sup>2-</sup> | 0.81            | -0.35                        | 1.00                          |                               |                 |                  |                |                  |
| HCO <sub>3</sub> <sup>-</sup> | 0.39            | 0.12                         | 0.05                          | 1.00                          |                 |                  |                |                  |
| Na <sup>+</sup>               | 0.44            | -0.28                        | 0.19                          | 0.20                          | 1.00            |                  |                |                  |
| Mg <sup>2+</sup>              | -0.23           | -0.24                        | -0.16                         | 0.09                          | 0.56            | 1.00             |                |                  |
| K <sup>+</sup>                | 0.24            | -0.17                        | 0.24                          | 0.18                          | 0.62            | 0.77             | 1.00           |                  |
| Ca <sup>2+</sup>              | 0.55            | -0.13                        | 0.28                          | -0.04                         | 0.24            | -0.48            | -0.21          | 1.00             |

Significance at p &lt; 0.05

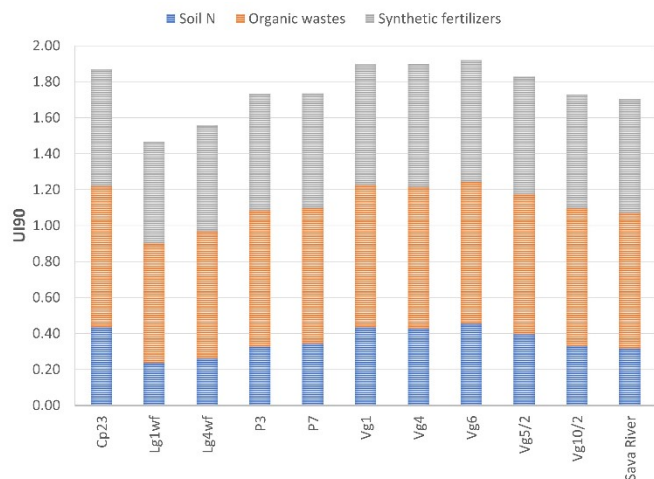

Fig. S1 Stacked column chart of the uncertainty analysis per sampling site.

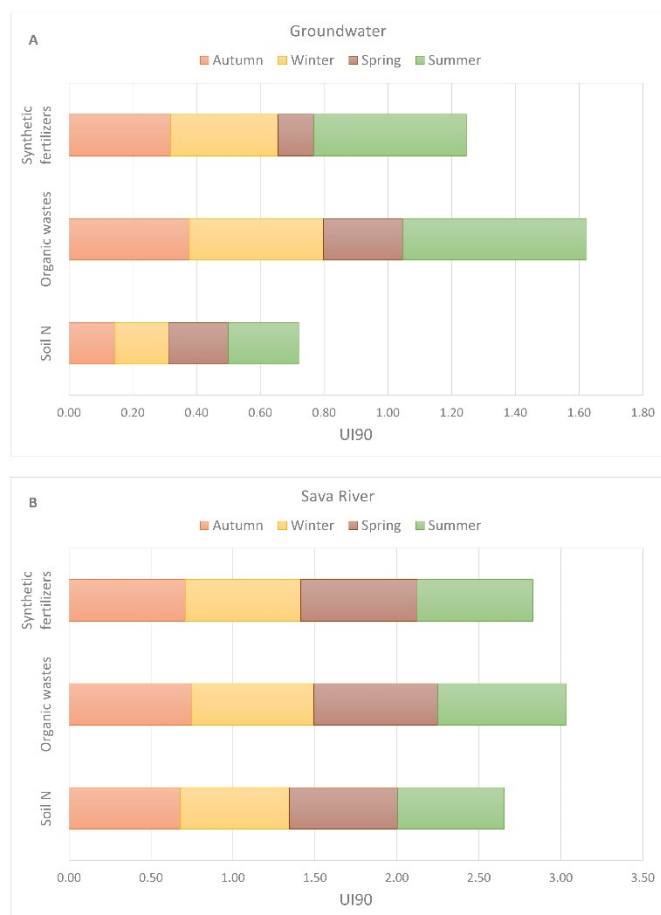

Figure S2 Stacked bar chart of the uncertainty analysis per season for groundwater (A) and Sava River (B).
