# Supplementary figures and images for: Tracing nitrate contamination sources and dynamics in an unconfined alluvial aquifer system (Velika Gorica well field, Croatia)
Source: Royal Society of Chemistry journal article supplement (doi:10.1039/d4em00527a), 2024-12-11

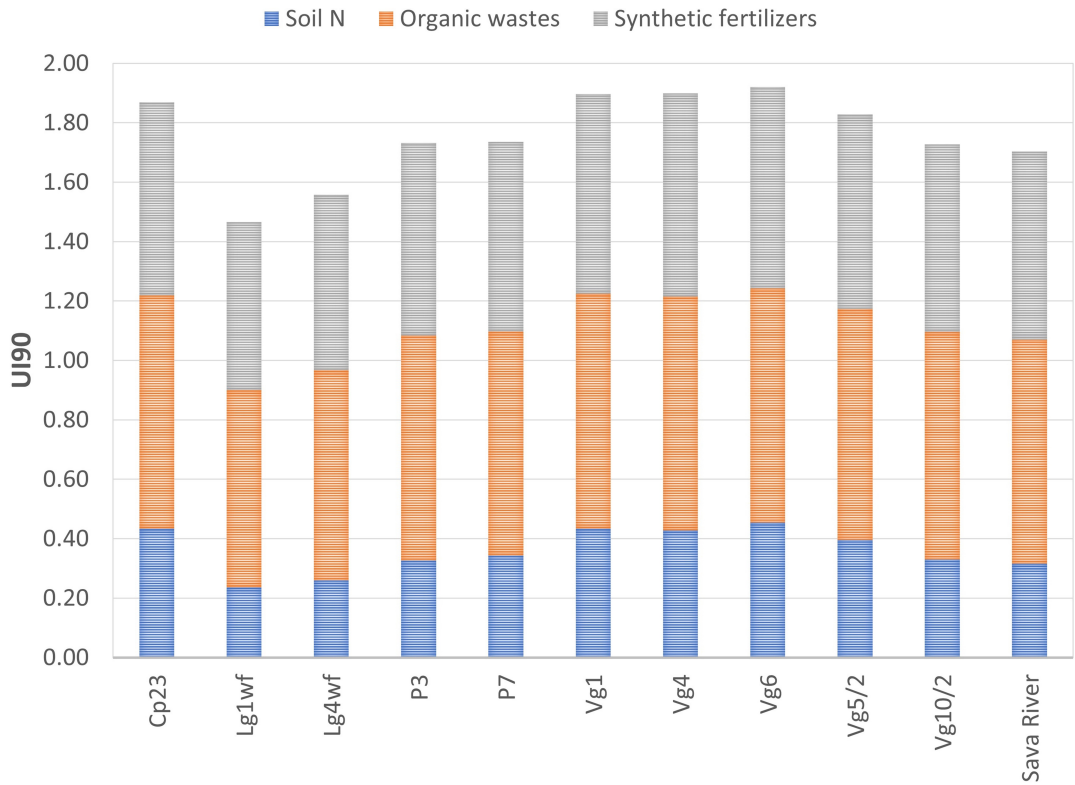

Supplement: d4em00527a1.pdf [file d4em00527a1.pdf]

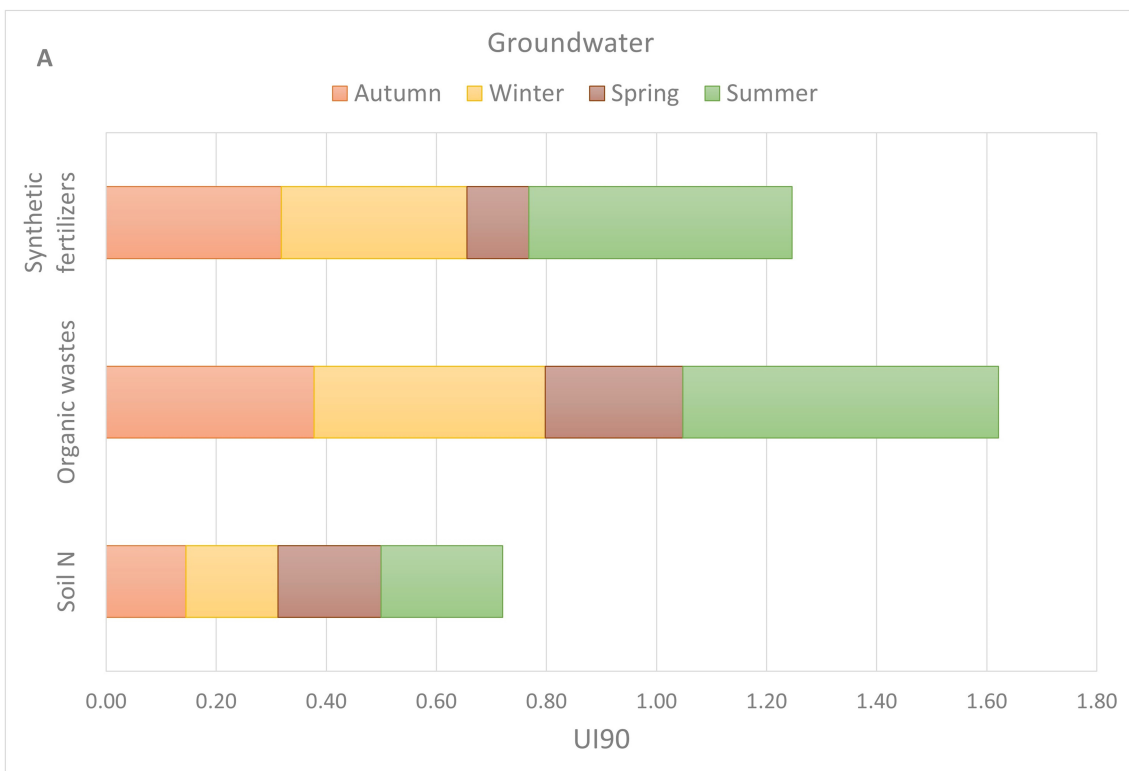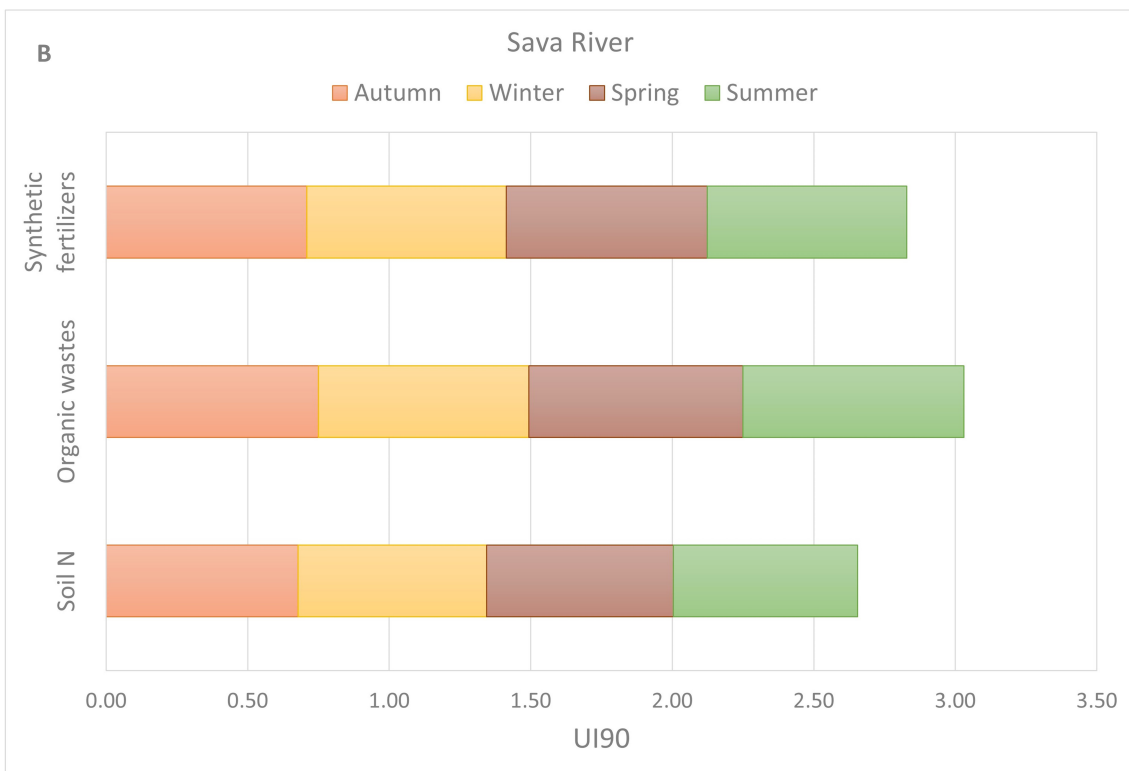

Supplement: d4em00527a2.pdf [file d4em00527a2.pdf]
